# Supplementary material for: Influence of temporally varying weatherability on CO 2 –climate coupling and ecosystem change in the late Paleozoic
Source: Copernicus journal article supplement (doi:10.5194/cp-2020-50), 2020-05-12
Supplement: Supplementary file [file cp-2020-50-AC2-supplement.pdf]

## RESPONSE TO ANONYMOUS REFEREE #2 COMMENTS (JUNE 2020)

**General Comment:** “This paper improves the CO<sub>2</sub> proxy record for the late Paleozoic and compares CO<sub>2</sub> variations to other Earth system indices. Considerable care has been taken in assembling this record and evaluating it statistically, which is much appreciated and it will be a useful resource for the community. The paper also adapts previous modeling to assess what has driven the changes in CO<sub>2</sub>, and concludes that a change towards more reactive silicate lithology is necessary, for which there is independent support. Overall in my opinion it is a good, clear paper that needs little revision. I do have some minor revisions to suggest.”

**Response:** We thank reviewer #2 for their appreciation of this work and encouraging comments.

**Comment (1):** “Line 39: typo “DiMichele, 2104”

**Response:** This has been fixed.

**Comment (2):** “Line 67: note the DOI address here does not currently work”

**Response:** This was intentional. The underlying data has been deposited in the Dryad Digital Repository, but we chose to keep the data private during the process of peer review. If this work is accepted, we will make the data fully public. Until that time, the data set can be shared privately via a URL if requested by either the editor or reviewers.

**Comment (3):** “Line 78: it is a bit confusing that this paper appears to cite itself? Again on line 137.”

**Response:** That is not a citation of this paper, but the underlying data. The author guide to Climate of the Past mandates “the proper citation of data sets in the text and the reference list (see section references) including the persistent identifier.” We have cited the dataset as Richey et al. 2020 to comply with these instructions. However, we have altered all of the in-text citations of the dataset to include the DOI and make it clear that the dataset is being cited (**lines 74, 79, 82, 138, 479** after changes suggested by reviewers 1 and 2). If we have misunderstood the instructions on how and when to cite the underlying data, please let us know and we will make any necessary changes.

**Comment (4):** “Line 112: Estimates of mean annual temperature are used to help determine past CO<sub>2</sub> levels. Any circularity should be considered here when going on to link the CO<sub>2</sub> estimates to climate.”

**Response:** Yes, this is correct; we used mean annual air temperatures as input for the PBUQ model to estimate the paleo-CO<sub>2</sub> estimates in cases where the paleosol estimates were reformulated in this study. For the part of the paleosol-based reconstruction that comes from Montañez et al. 2016 (i.e., the Pennsylvanian and earliest Permian estimates), a broad range of temperatures of 20 to 26°C (i.e., 23°C ±3°) was prescribed. For the estimates from Montañez et al. 2007 reformulated in this study (most Permian paleosol estimates), we use proxy soil

temperatures that come from many of the same paleosols (Tabor and Montañez 2005; Tabor et al., 2013). For the latter, for intervals with proxy soil temperatures of  $> 30^{\circ}\text{C}$ , we used temperatures  $5^{\circ}\text{C}$  lower as the MAAT, for proxy soil temperatures of  $>25^{\circ}\text{C}$  to  $\leq 30^{\circ}\text{C}$ , we used temperatures  $3^{\circ}\text{C}$  lower, and for temperatures  $\leq 25^{\circ}\text{C}$ , we used the actual proxy value. This scheme resulted in MAAT temperatures that range from 23 to  $30^{\circ}\text{C}$ . The error on these temperatures was assigned at  $\pm 3^{\circ}\text{C}$ , like the estimates from Montañez et al. 2016. Despite the differences in the method by which MAAT was prescribed or calculated, out of the 103 paleosol-based estimates, only 5 MAAT values used fall out of the range of 20 to  $26^{\circ}\text{C}$  (i.e.,  $23^{\circ}\text{C} \pm 3^{\circ}$ ).

These MAAT estimates are purposefully broad, given the uncertainty in paleo-temperatures for these past periods. However, the temperature ranges overlap with the range (18 to  $26^{\circ}\text{C}$ ) indicated by the climate modeling for the terrestrial realm of the Pennsylvanian and early Permian Pangaeian tropics (Poulsen et al. 2007; Montañez and Poulsen, 2013; Macarewich et al. in revision (*EPSL*)). In addition, the temperatures used overlap with the lower range of the pedogenic phyllosilicate temperatures (23 to  $32^{\circ}\text{C}$ ) published by Rosenau and Tabor (2013). Importantly, there is no circular reasoning involved in using these values, as the reviewer raised as a concern, as these temperature estimates of 20 to  $26^{\circ}\text{C}$  encapsulate the minimum and maximum temperatures simulated by a GCM (GENESIS3; Horton et al. 2010; 2012) and an Earth System Model (iCESM 1.2; Macarewich et al. 2019; in revision) for the continental tropics over a  $\text{CO}_2$  range of 280 to 840 ppm (overlapping the range of  $\text{CO}_2$  calculated in the LOESS analysis in this study (175 to 750 ppm). Thus, by using the full range of MAATS (20 to  $26^{\circ}\text{C}$ , rarely  $>26^{\circ}\text{C}$ ) consistently throughout the modeling of the samples of Pennsylvanian and earliest Permian age, we feel we have conservatively represented the realistic MAATs in the paleotropics during the late Paleozoic in a manner that precludes circularity.

**Comment (5):** “Line 118: The Donnadiu paper cited is about the Cretaceous? Surely the model runs are not from that work?”

**Response:** The Donnadiu et al. 2016 paper was solely referenced for the model and methods – not the results. However, after review, we have decided that Donnadiu et al. (2006) would be a more appropriate citation for model and methods than Donnadiu et al. (2016). We have addressed this removing Donnadiu et al. (2016) and adding “and approach as described in Donnadiu et al. (2006).” to the statement. The revised sentence now reads “The spatial distributions of the mean annual runoff and surface temperature were calculated offline for five time increments (Goddéris et al., 2017) covering the period of interest and for various atmospheric  $\text{CO}_2$  levels using the 3D ocean-atmosphere climate model FOAM and the approach as described in Donnadiu et al., (2006) (lines 117-119 after changes suggested by reviewers 1 and 2).

**Comment (6):** Line 170: “307 and 304.5 Ma” should read “307 until 304.5 Ma”?, “ $<400$  to  $\leftarrow 200$  ppm” also a bit confusing.

**Response:** This has been changed to “...2.5-Myr interval (307 to 304.5 Ma) of minimum  $\text{CO}_2$  values (less than 400 to as low as 200 ppm)...” (line 173 after changes suggested by reviewers 1 and 2).

**Comment (7):** Line 173: missing subscript in CO<sub>2</sub>

**Response:** This has been fixed (**line 176** after changes suggested by reviewers 1 and 2).

**Comment (8):** Line 269: “Notably, the 10-Myr pCO<sub>2</sub> nadir raises a paradox as to what was the primary CO<sub>2</sub> sink(s) at the time given that the CO<sub>2</sub> sinks of the Pennsylvanian were no longer prevalent. This paradox reflects the waning denudation rates of the CPM by the early Permian”. Note that Joshi et al. (2019) in GRL have run climate model simulations for the earliest Permian and find higher silicate weathering rates as the denudation rate wanes. They argue that denudation rates are not a strong control on silicate weathering in mountains where the rate is high. Perhaps a weaker relationship between denudation and silicate weathering may help explain the paradox identified here?

**Response:** We thank reviewer 1 for bringing to our attention this very important paper. Indeed, Joshi et al.’s (2019) modeling results would support the idea of a delayed capacitor-discharge mechanism as the origin of the long-term decline in pCO<sub>2</sub> through the last 16 Myr of the Carboniferous (in our record) from ~500 ppm to <300 ppm by the earliest Permian, as well as the return to rising pCO<sub>2</sub> (to >500 ppm) after 10 million years into the early Permian.

However, we think that we must delve deeper into the respective models. The main improvement of Joshi et al. (2019) compared to GEOCLIM is higher spatial resolution. The model used by Joshi et al. (2019) allows a better representation of runoff, and hence, weathering, especially in the Central Pangean Mountains (CPM). However, the major difference between both models is the absence of climate dependence in the calculation of the spatially resolved physical erosion in Joshi et al. (2019). In their model, physical erosion is only dependent on the prescribed altitude of each grid cell, meaning that physical erosion is an external forcing of the model. This has major implications for the results of the Joshi et al. (2019) model. Indeed, when the CPM are high, the drop in temperature limits weathering rates, without compensation by enhanced runoff linked to orographic impact on the atmospheric circulation. Consequently, in the Joshi et al. (2019) model, the maximum weathering is reached when the mountains are already eroded (due to temperature rise at lower altitude), but physical erosion is also a function of runoff. In GEOCLIM, the dependence of the physical erosion on runoff does not allow the existence of such a delay between the maximum altitude of the CPM and the lowest atmospheric CO<sub>2</sub>.

Thus, we have a new paragraph to address this in Section 4.2 An Early Permian CO<sub>2</sub> Nadir (see **lines 284-304** after changes suggested by reviewers 1 and 2). We hope that this change provides a balanced discussion of our and Joshi et al., (2019) work. The new paragraph reads:

“Two mechanisms have the potential to resolve this paradox. The first, referred to as a delayed climate-controlled capacitor (Joshi et al. 2019), leads to a multi-million-year delay between the timing of peak orogenic uplift and maximum chemical weathering potential and CO<sub>2</sub> drawdown due to substantial differences in chemical weathering rates during the different phases of an orogenic cycle. In their study, the highest intensity of chemical weathering and capacity for CO<sub>2</sub> consumption occurs when mountains have been somewhat denuded rather than during peak uplift, reflecting the disproportionate influence of runoff temperature over hydrology and erosion on weathering potential. Notably, Joshi et al.’s (2019) coupled climate and geochemical modeling of the Late Paleozoic Ice Age yield an evolution of simulated pCO<sub>2</sub> over the period of

uplift and denudation of the CPM that corresponds both in absolute CO<sub>2</sub> concentrations and magnitude of change over this period (~320 to 290 Ma). That said, in Joshi et al. (2019), the physical erosion parameter is not dependent on climate, but, rather, is defined by the prescribed altitude. Thus physical erosion is an external forcing in their model. The absence of runoff dependence for physical erosion (as is the case for GEOCLIM) and the strong dependence of weathering on temperature may be the trigger for their simulated delay between maximum uplift and the highest intensity of CO<sub>2</sub> consumption by silicate weathering. In GEOCLIM, the dependence of the physical erosion on runoff does not allow for a millions of years delay between maximum uplift of the CPM and lowest simulated *p*CO<sub>2</sub>. Further study is needed to interrogate the influence of this approach on the results.

The second mechanism, proposed here, is a substantial shift in the ratio of mafic-to-granite rocks available for weathering from the latest Carboniferous to the early Permian. This reflects the doubling or greater increase in weatherability of mafic mineral assemblages over granitic assemblages (Gaillardet et al., 1999; Dessert et al., 2003; Ibarra et al., 2016), thus enhancing weathering efficiency and CO<sub>2</sub> drawdown, and creating a tighter coupling between CO<sub>2</sub> and climate. In turn, with tighter coupling between CO<sub>2</sub> and climate, the global silicate weathering flux needed to maintain homeostatic balance in the carbon cycle for a given scenario can be attained at a lower *p*CO<sub>2</sub> level.”

**Comment (9):** Line 284: The comparison to Macdonald et al. is a little different in timing: their suture length reconstructions are small after 300 Ma.

**Response:** We are not sure whether we have misunderstood this comment. We agree that the compilation of suture zones made by Macdonald et al. (2019) indicates that the ~10,000 km long Hercynian arc-continent suture zone (in the paleotropics) was at a peak prior to 300 Ma (transition from Carboniferous to Permian). Lines 286–289 (**lines 308-310** after changes suggested by reviewers 1 and 2), state that we used GEOCLIM to test the Macdonald et al. 2019 hypothesis that the influence of increased mafic (ophiolites in their study) on *p*CO<sub>2</sub> was greatest in the *Carboniferous*. As well as to “to evaluate the potential of increased weatherability, provided by increasing the ratio of outcropping mafic rocks to granite rocks available for weathering, as the predominant driver of *the early Permian* CO<sub>2</sub> nadir. We may have confused the reader by referring to both goals of the modeling in this section.

This has been resolved by revising the sentence (**lines 308-310** after changes suggested by reviewers 1 and 2) to read “Here, we used the GEOCLIM model to, first, interrogate this Carboniferous hypothesis further and, second, to evaluate the potential of increased weatherability, provided by increasing the ratio of outcropping mafic rocks to granite rocks available for weathering, as the predominant driver of the early Permian CO<sub>2</sub> nadir.”

**Comment (10):** Line 306: “rapid (0.000043/Myr)” use standard form here perhaps?

**Response:** This has not been changed as we believe the reviewer was asking that we change Myr to Ma. However, this would be incorrect as Ma is for a specific time vs. Myr for an increment of time (here 1 million years).

**Comment (11):** Line 319: “our modeling results indicate that this is not compatible with proxy inferred moderate surface conditions of the late Carboniferous” I would imagine many of the model parameters are not known well enough to really rule this out? Perhaps a more tentative statement here?

**Response:** We very much appreciate the reviewer’s comment and we agree that the model parameters are associated with uncertainty. The results that we refer to in this section of the Discussion (Lines 284-328, **lines 305-339** after changes suggested by reviewers 1 and 2) are 1<sup>st</sup>-order differences in steady-state  $p\text{CO}_2$  that would lead to climate regimes, which differ remarkably from one another. For example, the modeled steady-state  $p\text{CO}_2$  for a 2- to 4-fold increase in the surface outcropping of mafic rocks available for weathering in the Pennsylvanian leads to near Snowball Earth conditions, which are incompatible with other earth system conditions at that time (from the literature). Conversely, modeling with the reference continental silicate mineral assemblage (GEOCLIM-REG) maintains the steady-state  $p\text{CO}_2$  below the threshold for initiation of continental ice sheets but above unreasonably low values (<200 ppm). However, as the reviewer points out, there are uncertainties in the modeling. For example, if the solid Earth degassing rates increased through the Pennsylvanian (we invoke a constant  $\text{CO}_2$  degassing rate), then it is feasible that an increased component of weathering of mafic rocks would have maintained sufficiently high  $\text{CO}_2$  concentrations to accommodate the independent evidence for surface conditions at this time.

To that end, we have tempered the statements in Lines 318 to 328 (**lines 340-350** after changes suggested by reviewers 1 and 2) by revising the text as follows:

“If peak ophiolite exhumation and maximum  $\text{CO}_2$  consumption by their weathering occurred in the late Carboniferous, thus initiating the LPIA (~330 to 300 Ma) as has been suggested (Table S1 of Macdonald et al., 2019), then our modeling results suggest that a substantial increase in solid Earth degassing rate at this time would have been necessary. In our simulation, increasing the surface area of outcropping mafic rocks (2- to 4-fold) during the Pennsylvanian results in steady-state atmospheric  $\text{CO}_2$  levels approaching Snowball Earth conditions given other operating influences on weatherability and  $\text{CO}_2$  sequestration at the time and no change in degassing rate (Fig. S6). Such conditions are not compatible with proxy inferred moderate surface conditions of the late Carboniferous (Montañez and Poulsen, 2013) and the radiation of forest ecosystems throughout the tropics (DiMichele, 2014). Rather, we hypothesize that the sustained  $\text{CO}_2$  nadir and expansion of ice sheets in the first 10 Myr of the Permian record a major reorganization of the predominant factors influencing weatherability in the tropics across the Carboniferous-Permian transition, in particular, a substantial shift in the ratio of mafic-to-granitic rocks available for weathering.”
